# Supplementary material for: Colletotrichum perseae and Colletotrichum gloeosporioides sensu strictu Causing Stem Lesion and Dieback in Avocado in Italy
Source: MDPI journal article supplement (doi:10.3390/horticulturae12010111), 2026-01-19
Supplement: s1 [file Table S1.pdf › horticulturae-4053211-supplementary/Table S1.pdf]

**Table S1.** List of amplified loci, corresponding primer names and sequences, and full PCR conditions applied in this study.

| Locus        | Primer name | Primer sequence 5'-3'    | PCR mixture                                                                                                                                                    | Thermal cycler conditions                                                                                                                                         |
|--------------|-------------|--------------------------|----------------------------------------------------------------------------------------------------------------------------------------------------------------|-------------------------------------------------------------------------------------------------------------------------------------------------------------------|
| <i>gapdh</i> | GDF1        | CCCGTCAACGACCCCTTCATTGA  | Reaction volume: 25µL<br>Taq: 1 U<br>PCR buffer: 1×<br>MgCl <sub>2</sub> : 1 - 2.5 mM<br>dNTPs: 0.2 mM each<br>Primers: 0.2 µM each<br>Genomic DNA: 20 - 50 ng | Initial denaturation at 94 °C for 3 min, followed by 35 cycles of 94 °C for 30 s, 55 °C for 30 s, and 72 °C for 45 s, with a final extension at 72 °C for 5 min   |
|              | GDR1        | GGGTGGAGTCGTACTTGAGCATGT |                                                                                                                                                                |                                                                                                                                                                   |
| <i>chs-1</i> | CHS-79F     | TGGGGCAAGGATGCCTGGAAGAAG |                                                                                                                                                                | Initial denaturation at 94 °C for 5 min, followed by 40 cycles of 94 °C for 30 s, 52 °C for 30 s, and 72 °C for 30 s, with a final extension at 72 °C for 7 min   |
|              | CHS-354R    | TGGAAGAACCATCTGTGGGAGTTG |                                                                                                                                                                |                                                                                                                                                                   |
| <i>act</i>   | ACT-512F    | ATGTGCAAGGCCGGTTTCGC     |                                                                                                                                                                | Initial denaturation at 95 °C for 4 min, followed by 40 cycles of 95 °C for 30 s, 58 °C for 30 s, and 72 °C for 45 s, with a final extension at 72 °C for 7 min   |
|              | ACT-783R    | TAGGAGTCCTTCTGACCCAT     |                                                                                                                                                                |                                                                                                                                                                   |
| <i>tub2</i>  | T1          | AACATGCGTGAGATTGTAAGT    |                                                                                                                                                                | Initial denaturation at 95 °C for 5 min, followed by 40 cycles of 95 °C for 30 s, 55 °C for 30 s, and 72 °C for 45 s, with a final extension at 72 °C for 7 min   |
|              | Bt2-b       | ACCCTCAGTGTAGTGACCCTTGGC |                                                                                                                                                                |                                                                                                                                                                   |
| <i>cal</i>   | CL1C        | GAATTCAAGGAGGCCTTCTC     |                                                                                                                                                                | Initial denaturation at 95 °C for 3 min, followed by 35 cycles of 95 °C for 30 s, 59 °C for 30 s, and 72 °C for 45 s, with a final extension at 72 °C for 7 min   |
|              | CL2C        | CTTCTGCATCATGAGGTGGAC    |                                                                                                                                                                |                                                                                                                                                                   |
| <i>gs</i>    | GSF1        | ATGGCCGATACATCTGG        |                                                                                                                                                                | Initial denaturation at 94 °C for 4 min, followed by 35 cycles of 94 °C for 45 s, 60 °C for 45 s, and 72 °C for 1 min, with a final extension at 72 °C for 10 min |
|              | GSR1        | GAACCGTCGAAGTTCCAC       |                                                                                                                                                                |                                                                                                                                                                   |
| ApMat        | AMF1        | TCATTCTACGTATGTGCCCCG    |                                                                                                                                                                | Initial denaturation at 94 °C for 3 min, followed by 30 cycles of 94 °C for 45 s, 62 °C for 45 s, and 72 °C for 1 min, with a final extension at 72 °C for 7 min  |
|              | AMR1        | CCAGAAATACACCGAACTTGC    |                                                                                                                                                                |                                                                                                                                                                   |
