# Supplementary material for: Colletotrichum perseae and Colletotrichum gloeosporioides sensu strictu Causing Stem Lesion and Dieback in Avocado in Italy
Source: MDPI journal article supplement (doi:10.3390/horticulturae12010111), 2026-01-19
Supplement: s1 [file Table S2.pdf › horticulturae-4053211-supplementary/Table S2.pdf]

**Table S2.** Collection details and GenBank accession numbers of isolates included in this study.

| Species                             | Isolate *          | Host                                           | Location     | Genbank accession numbers * |              |            |             |            |           |          |
|-------------------------------------|--------------------|------------------------------------------------|--------------|-----------------------------|--------------|------------|-------------|------------|-----------|----------|
|                                     |                    |                                                |              | <i>gapdh</i>                | <i>chs-1</i> | <i>act</i> | <i>tub2</i> | <i>cal</i> | <i>gs</i> | ApMat    |
| <i>Colletotrichum aenigma</i>       | ICMP 18608         | <i>Persea americana</i>                        | Israel       | JX010044                    | JX009774     | JX009443   | JX010389    | JX009683   | JX010078  | KM360143 |
| <i>Colletotrichum aeshynomenes</i>  | ICMP 17673         | <i>Aeschynomene virginica</i>                  | USA          | JX009930                    | JX009799     | JX009483   | JX010392    | JX009721   | JX010081  | KM360145 |
| <i>Colletotrichum alatae</i>        | ICMP 17919         | <i>Dioscorea alata</i>                         | India        | JX009990                    | JX009837     | JX009471   | JX010383    | JX009738   | JX010065  | KC888932 |
| <i>Colletotrichum alienum</i>       | ICMP 12071         | <i>Malus domestica</i>                         | New Zealand  | JX010028                    | JX009882     | JX009572   | JX010411    | JX009654   | JX010101  | KM360144 |
| <i>Colletotrichum analogum</i>      | YMF 1.06943        | <i>Ageratina adenophora</i>                    | China        | OK513663                    | OK513559     | OK513599   | OK513629    | -          | -         | -        |
| <i>Colletotrichum aotearoa</i>      | ICMP 18537         | <i>Coprosma</i> sp.                            | New Zealand  | JX010005                    | JX009853     | JX009564   | JX010420    | JX009611   | JX010113  | KC888930 |
| <i>Colletotrichum arecicola</i>     | CGMCC 3.19667      | <i>Areca catechu</i>                           | China        | MK935455                    | MK935541     | MK935374   | MK935498    | -          | -         | MK935413 |
| <i>Colletotrichum artocarpicola</i> | MFLUCC 18-1167     | <i>Artocarpus heterophyllus</i>                | Thailand     | MN435568                    | MN435569     | MN435570   | MN435567    | -          | -         | -        |
| <i>Colletotrichum asianum</i>       | ICMP 18580         | <i>Coffea arabica</i>                          | Thailand     | JX010053                    | JX009867     | JX009584   | JX010406    | FJ917506   | JX010096  | FR718814 |
| <i>Colletotrichum australianum</i>  | VPRI 43075; UMC002 | <i>Citrus sinensis</i>                         | Australia    | MG572127                    | MW091987     | MN442109   | MG572149    | -          | MG572160  | MG572171 |
| <i>Colletotrichum camelliae</i>     | CGMCC 3.14925      | <i>Camellia sinensis</i>                       | China        | KJ954782                    | -            | KJ954363   | KJ955230    | KJ954634   | KJ954932  | KJ954497 |
| <i>Colletotrichum cangyuanense</i>  | YMF 1.05000        | <i>Ageratina adenophora</i>                    | China        | OK513666                    | OK513562     | OK513602   | OK513632    | -          | -         | -        |
| <i>Colletotrichum castaneae</i>     | HGUP 22097         | <i>Jasminum grandiflorum</i>                   | Thailand     | OP737974                    | OP715779     | OP715813   | -           | -          | -         | -        |
| <i>Colletotrichum changpingense</i> | MFLUCC 15-0022     | <i>Fragaria × ananassa</i>                     | China        | KP852469                    | KP852449     | KP683093   | KP852490    | -          | -         | -        |
| <i>Colletotrichum Chiangmaiense</i> | MFLU 20-0604       | <i>Magnolia garrettii</i>                      | Thailand     | MW548592                    | MW623653     | MW655578   | -           | -          | -         | -        |
| <i>Colletotrichum chrysophilum</i>  | CMM4268            | <i>Musa</i> sp.                                | Brazil       | KX094183                    | KX094083     | KX093982   | KX094285    | KX094063   | KX094204  | KX094325 |
| <i>Colletotrichum cigarro</i>       | ICMP 18539         | <i>Olea europaea</i>                           | Australia    | JX009966                    | JX009800     | JX009523   | JX010434    | JX009635   | JX010132  | -        |
| <i>Colletotrichum clidemiae</i>     | ICMP 18658         | <i>Clidemia hirta</i>                          | USA (Hawaii) | JX009989                    | JX009877     | JX009537   | JX010438    | JX009645   | JX010129  | KC888929 |
| <i>Colletotrichum cobbittense</i>   | BRIP 66219         | <i>Cordyline stricta</i> × <i>C. australis</i> | Australia    | MH094133                    | MH094135     | MH094134   | MH094137    | -          | -         | -        |
| <i>Colletotrichum conoides</i>      | CGMCC 3.17615      | <i>Capsicum annuum</i>                         | China        | KP890162                    | KP890156     | KP890144   | KP890174    | KP890150   | -         | -        |
| <i>Colletotrichum cordylinicola</i> | ICMP 18579         | <i>Cordyline fruticosa</i>                     | Thailand     | JX009975                    | JX009864     | HM470235   | JX010440    | HM470238   | JX010122  | JQ899274 |
| <i>Colletotrichum dracaenigenum</i> | MFLUCC 19-0430     | <i>Dracaena</i> sp.                            | Thailand     | MT215577                    | MT215575     | MT313686   | -           | -          | -         | -        |
| <i>Colletotrichum endophyticum</i>  | MFLUCC 13-0418     | <i>Pennisetum purpureum</i>                    | Thailand     | KC832854                    | -            | KF306258   | MZ673954    | KC810018   | -         | -        |
| <i>Colletotrichum fici-septicae</i> | MFLU 19-2770       | <i>Ficus</i> sp.                               | Taiwan       | MW183774                    | MW177701     | MW151585   | -           | -          | -         | -        |
| <i>Colletotrichum fruticicola</i>   | ICMP 18581         | <i>Coffea arabica</i>                          | Thailand     | JX010033                    | JX009866     | FJ907426   | JX010405    | FJ917508   | JX010095  | JQ807838 |

|                                                                    |                                         |                                     |              |                 |                 |                 |                 |                 |                 |                 |
|--------------------------------------------------------------------|-----------------------------------------|-------------------------------------|--------------|-----------------|-----------------|-----------------|-----------------|-----------------|-----------------|-----------------|
| <i>Colletotrichum fructivorum</i>                                  | CBS 133125                              | <i>Vaccinium macrocarpon</i>        | USA          | MZ664047        | MZ799259        | MZ664126        | JX145196        | -               | -               | JX145300        |
| <i>Colletotrichum gardeniae</i>                                    | HGUP 22032 = GUCC<br>12049              | <i>Gardenia jasminoides</i>         | China        | OP737963        | OP715766        | OP715801        | OP720858        | -               | -               | -               |
| <i>Colletotrichum gloeosporioides</i>                              | LC3312 = LF534                          | <i>Camellia sinensis</i>            | China        | KJ954859        | -               | KJ954434        | KJ955305        | KJ954710        | KJ955009        | KJ954569        |
| <i>Colletotrichum gloeosporioides</i>                              | GA077                                   | <i>Persea americana</i>             | Israel       | KX620239        | -               | KX620142        | KX620338        | KX620203        | KX62027<br>2    | KX620174        |
| <i>Colletotrichum gloeosporioides</i>                              | CBS 112999                              | <i>Citrus sinensis</i>              | Italy        | JQ005239        | JQ005326        | JQ005500        | JQ005587        | JQ005673        | JX010085        | JQ807843        |
| <i>Colletotrichum gloeosporioides</i>                              | BRIP 28546a = VPRI<br>43028 = A09-43028 | <i>Citrus sinensis</i> cv.<br>Navel | Australia    | MK470020        | MW09197<br>8    | MK470092        | MK470056        | -               | MK47003<br>8    | MK470074        |
| <i>Colletotrichum gloeosporioides</i><br>(ex <i>C. citrulli</i> )  | CAASZT52                                | <i>Citrullus lanatus</i>            | China        | OL456685        | OL901153        | OL449283        | OL456644        | -               | -               | -               |
| <i>Colletotrichum gloeosporioides</i><br>(ex <i>C. dimorphum</i> ) | YMF 1.07303                             | <i>Ageratina adenophora</i>         | China        | OK513669        | OK513565        | OK513605        | OK513635        | -               | -               | -               |
| <b><i>Colletotrichum gloeosporioides</i></b>                       | <b>APIN 3</b>                           | <b><i>Persea americana</i></b>      | <b>Italy</b> | <b>PX560514</b> | <b>PX560503</b> | <b>PX560472</b> | <b>PX560536</b> | <b>PX560492</b> | <b>PX560525</b> | <b>PX560483</b> |
| <b><i>Colletotrichum gloeosporioides</i></b>                       | <b>APIN 4</b>                           | <b><i>Persea americana</i></b>      | <b>Italy</b> | <b>PX560515</b> | <b>PX560504</b> | <b>PX560473</b> | <b>PX560537</b> | <b>PX560493</b> | <b>PX560526</b> | <b>PX560484</b> |
| <b><i>Colletotrichum gloeosporioides</i></b>                       | <b>APIN 7</b>                           | <b><i>Persea americana</i></b>      | <b>Italy</b> | <b>PX560516</b> | <b>PX560505</b> | <b>PX560474</b> | <b>PX560538</b> | <b>PX560494</b> | <b>PX560527</b> | <b>PX560485</b> |
| <b><i>Colletotrichum gloeosporioides</i></b>                       | <b>APIN 13</b>                          | <b><i>Persea americana</i></b>      | <b>Italy</b> | <b>PX560517</b> | <b>PX560506</b> | <b>PX560475</b> | <b>PX560539</b> | <b>PX560495</b> | <b>PX560528</b> | <b>PX560486</b> |
| <b><i>Colletotrichum gloeosporioides</i></b>                       | <b>APIN 14</b>                          | <b><i>Persea americana</i></b>      | <b>Italy</b> | <b>PX560518</b> | <b>PX560507</b> | <b>PX560476</b> | <b>PX560540</b> | <b>PX560496</b> | <b>PX560529</b> | <b>PX560483</b> |
| <i>Colletotrichum gracile</i>                                      | YMF 1.06939                             | <i>Ageratina adenophora</i>         | China        | OK513671        | OK513567        | OK513607        | OK513637        | -               | -               | -               |
| <i>Colletotrichum grevilleae</i>                                   | CBS 132879                              | <i>Grevillea</i> sp.                | Italy        | KC297010        | KC296987        | KC296941        | KC297102        | KC296963        | KC29703<br>3    | -               |
| <i>Colletotrichum grossum</i>                                      | CGMCC3.17614                            | <i>Capsicum annuum</i>              | China        | KP890159        | KP890153        | KP890141        | KP890171        | KP890147        | -               | -               |
| <i>Colletotrichum hebeiense</i>                                    | MFLUCC 13-0726                          | <i>Vitis vinifera</i>               | China        | KF377495        | KF289008        | KF377532        | KF288975        | -               | -               | KF377562        |
| <i>Colletotrichum hedericola</i>                                   | MFLU 15-0689                            | <i>Hedera helix</i>                 | Italy        | -               | MN635794        | MN635795        | -               | -               | -               | -               |
| <i>Colletotrichum helleniense</i>                                  | CBS 142418                              | <i>Poncirus trifoliata</i>          | Greece       | KY856270        | KY856186        | KY856019        | KY856528        | KY856099        | -               | -               |
| <i>Colletotrichum henanense</i>                                    | CGMCC 3.17354                           | <i>Camellia sinensis</i>            | China        | KJ954810        | -               | KM023257        | KJ955257        | KJ954662        | KJ954960        | KJ954524        |
| <i>Colletotrichum horii</i>                                        | ICMP 10492                              | <i>Diospyros kaki</i>               | Japan        | GQ329681        | JX009752        | JX009438        | JX010450        | JX009604        | JX010137        | JQ807840        |
| <i>Colletotrichum hystricis</i>                                    | CBS 142411                              | <i>Citrus hystrix</i>               | Italy        | KY856274        | KY856190        | KY856023        | KY856532        | KY856103        | -               | -               |
| <i>Colletotrichum jiangxiense</i>                                  | CGMCC 3.17363                           | <i>Camellia sinensis</i>            | China        | KJ954902        | -               | KJ954471        | KJ955348        | KJ954752        | KJ955051        | KJ954607        |
| <i>Colletotrichum kahawae</i>                                      | ICMP 17816                              | <i>Coffea robusta</i>               | Kenya        | JX010012        | JX009813        | JX009452        | JX010444        | JX009642        | JX010130        | JQ894579        |

|                                           |                         |                             |              |          |          |          |          |          |          |          |
|-------------------------------------------|-------------------------|-----------------------------|--------------|----------|----------|----------|----------|----------|----------|----------|
| <i>Colletotrichum kunmingense</i>         | HGUP 22049 = GUCC 12053 | <i>Ophiopogon japonicus</i> | China        | OP737965 | OP715769 | OP715804 | OP720861 | -        | -        | -        |
| <i>Colletotrichum ledongense</i>          | CGMCC 3.18888 = LD1683  | <i>Hevea brasiliensis</i>   | China        | MG242017 | MG242019 | MG242015 | MG242011 | MG242013 | MG242021 | -        |
| <i>Colletotrichum ligustri</i>            | HGUP 22051 = GUCC 12111 | <i>Ilex chinensis</i>       | China        | OP737968 | OP715773 | OP740216 | OP720864 | -        | -        | -        |
| <i>Colletotrichum makassarensense</i>     | CBS 143664              | <i>Capsicum annuum</i>      | Indonesia    | MH728820 | MH805850 | MH781480 | MH846563 | -        | MH748264 | MH728831 |
| <i>Colletotrichum menglaense</i>          | YMF 1.04960             | air sample                  | China        | MH023507 | MH023508 | MH023506 | -        | -        | -        | -        |
| <i>Colletotrichum mengyinense</i>         | SAUCC200702             | <i>Rosa chinensis</i>       | China        | MW846240 | MW883686 | MW883695 | MW888970 | MW922538 | MW888961 | -        |
| <i>Colletotrichum musae</i>               | ICMP 19119              | <i>Musa</i> sp.             | USA          | JX010050 | JX009896 | JX009433 | HQ596280 | JX009742 | JX010103 | KC888926 |
| <i>Colletotrichum nanhuaense</i>          | YMF1.04993              | <i>Ageratina adenophora</i> | China        | OK513673 | OK513569 | OK513609 | OK513639 | -        | -        | -        |
| <i>Colletotrichum noveboracense</i>       | CBS 146410 - AFKH109    | <i>Malus domestica</i>      | USA          | MN640567 | -        | MN640565 | MN640569 | MN640566 | MN640568 | MN640564 |
| <i>Colletotrichum nullisetosum</i>        | YMF 1.06946             | <i>Mangifera indica</i>     | China        | OK513675 | OK513571 | OK513611 | OK513641 | -        | -        | -        |
| <i>Colletotrichum nupharicola</i>         | ICMP 18187              | <i>Musa sapientum</i>       | Kenya        | JX009972 | JX009835 | JX009437 | JX010398 | JX009663 | JX010088 | JX145319 |
| <i>Colletotrichum oblongisporum</i>       | YMF 1.06938             | <i>Ageratina adenophora</i> | China        | OK513677 | OK513573 | -        | OK513643 | -        | -        | -        |
| <i>Colletotrichum perseae</i>             | Pa01                    | <i>Persea americana</i>     | Turkey       | -        | -        | PQ227308 | -        | PQ227310 | -        | PQ227312 |
| <i>Colletotrichum perseae</i>             | CBS 141365 = GA100      | <i>Persea americana</i>     | Israel       | KX620242 | MZ799260 | KX620145 | KX620341 | KX620206 | KX620275 | KX620177 |
| <i>Colletotrichum perseae</i>             | CBS 141366 = GA272      | <i>Persea americana</i>     | Israel       | KX620255 | -        | KX620158 | KX620354 | KX620220 | KX620287 | KX620188 |
| <i>Colletotrichum perseae</i>             | GA335                   | <i>Persea americana</i>     | Israel       | KX620259 | -        | KX620162 | KX620358 | KX620224 | KX620291 | KX620192 |
| <i>Colletotrichum perseae</i>             | APIN 8                  | <i>Persea americana</i>     | Italy        | PX560519 | PX560508 | PX560477 | PX560541 | PX560497 | PX560530 | -        |
| <i>Colletotrichum perseae</i>             | APIN 9                  | <i>Persea americana</i>     | Italy        | PX560520 | PX560509 | PX560478 | PX560542 | PX560498 | PX560531 | -        |
| <i>Colletotrichum perseae</i>             | APIN 10                 | <i>Persea americana</i>     | Italy        | PX560521 | PX560510 | PX560479 | PX560543 | PX560499 | PX560532 | PX560484 |
| <i>Colletotrichum perseae</i>             | APIN 16                 | <i>Persea americana</i>     | Italy        | PX560522 | PX560511 | PX560480 | PX560544 | PX560500 | PX560533 | PX560485 |
| <i>Colletotrichum perseae</i>             | APIN 20                 | <i>Persea americana</i>     | Italy        | PX560523 | PX560512 | PX560481 | PX560545 | PX560501 | PX560534 | PX560486 |
| <i>Colletotrichum perseae</i>             | APIN 21                 | <i>Persea americana</i>     | Italy        | PX560524 | PX560513 | PX560482 | PX560546 | PX560502 | PX560535 | PX560487 |
| <i>Colletotrichum proteae</i>             | CBS 132882              | <i>Protea</i> sp.           | South Africa | KC297009 | KC296986 | KC296940 | KC297101 | KC296960 | -        | -        |
| <i>Colletotrichum pseudotheobromicola</i> | MFLUCC 18–1602          | <i>Prunus avium</i>         | China        | MH853675 | MH853678 | MH853681 | MH853684 | -        | -        | -        |
| <i>Colletotrichum psidii</i>              | ICMP 19120              | <i>Psidium</i> sp.          | Italy        | JX009967 | JX009901 | JX009515 | JX010443 | JX009743 | JX010133 | KC888931 |
| <i>Colletotrichum pyrifoliae</i>          | CGMCC 3.18902           | <i>Pyrus pyrifolia</i>      | China        | MG747996 | MG747914 | MG747768 | MG748158 | -        | -        | -        |

|                                                               |                |                                                       |             |          |          |          |          |          |          |          |
|---------------------------------------------------------------|----------------|-------------------------------------------------------|-------------|----------|----------|----------|----------|----------|----------|----------|
| <i>Colletotrichum queenslandicum</i>                          | ICMP 1778      | <i>Carica papaya</i>                                  | Australia   | JX009934 | JX009899 | JX009447 | JX010414 | JX009691 | JX010104 | KC888928 |
| <i>Colletotrichum rhexiae</i>                                 | CBS 133134     | <i>Rhexia virginica</i>                               | USA         | MZ664046 | MZ799258 | MZ664127 | JX145179 | -        | -        | JX145290 |
| <i>Colletotrichum salsolae</i>                                | ICMP 19051     | <i>Salsola tragus</i>                                 | Hungary     | JX009916 | JX009863 | JX009562 | JX010403 | JX009696 | JX010093 | KC888925 |
| <i>Colletotrichum siamense</i>                                | ICMP 18578     | <i>Coffea arabica</i>                                 | Thailand    | JX009924 | JX009865 | FJ907423 | JX010404 | FJ917505 | JX010094 | JQ899289 |
| <i>Colletotrichum siamense</i><br>(ex <i>C. pandanicola</i> ) | MFLUCC 17-0571 | <i>Pandanus</i> sp.                                   | Thailand    | MG646934 | MG646931 | MG646938 | MG646926 | -        | -        | -        |
| <i>Colletotrichum siamense</i><br>(ex <i>C. parvisporum</i> ) | YMF 1.06942    | <i>Ageratina adenophora</i>                           | China       | OK513679 | OK513575 | OK513613 | OK513645 | -        | -        | -        |
| <i>Colletotrichum subhenanense</i>                            | YMF1.06865     | <i>Ageratina adenophora</i>                           | China       | OK513684 | OK513581 | OK513618 | OK513647 | -        | -        | -        |
| <i>Colletotrichum syzygiicola</i>                             | MFLUCC 10-0624 | <i>Syzygium samarangense</i>                          | Thailand    | KF242156 | -        | KF157801 | KF254880 | KF254859 | KF242125 | -        |
| <i>Colletotrichum tainanense</i>                              | CBS 143666     | <i>Capsicum annuum</i>                                | Taiwan      | MH728823 | MH805845 | MH781475 | MH846558 | -        | MH748259 | MH728836 |
| <i>Colletotrichum temperatum</i>                              | CBS 133122     | <i>Vaccinium macrocarpon</i>                          | USA         | MZ664045 | MZ799254 | MZ664125 | JX145211 | -        | -        | JX145298 |
| <i>Colletotrichum tengchongense</i>                           | YMF 1.04950    | <i>Isoetes sinensis</i>                               | China       | OL981264 | OL981290 | OL981238 | -        | -        | -        | -        |
| <i>Colletotrichum thasutense</i>                              | MFLU 22-0206   | <i>Syngonium</i> sp.                                  | Thailand    | OP831282 | OP831281 | OP831280 | OP831283 | -        | -        | -        |
| <i>Colletotrichum theobromicola</i>                           | ICMP 18649     | <i>Theobroma cacao</i>                                | Panama      | JX010006 | JX009869 | JX009444 | JX010447 | JX009591 | JX010139 | KC790726 |
| <i>Colletotrichum ti</i>                                      | ICMP 4832      | <i>Coryline</i> sp.                                   | New Zealand | JX009952 | JX009898 | JX009520 | JX010442 | JX009649 | JX010123 | KM360146 |
| <i>Colletotrichum tomentosae</i>                              | ZHKUCC 21-0103 | <i>Citrus maxima</i> cv.<br>Tomentosa                 | China       | OL855850 | OL855860 | OL855870 | OL855887 | -        | -        | -        |
| <i>Colletotrichum tropicale</i>                               | ICMP 18653     | <i>Theobroma cacao</i>                                | Panama      | JX010007 | JX009870 | JX009489 | JX010407 | JX009719 | JX010097 | KC790728 |
| <i>Colletotrichum viniferum</i>                               | GZAAS 5.08601  | <i>Vitis vinifera</i> cv.<br>Shuijing                 | China       | JN412798 | -        | JN412795 | JN412813 | JQ309639 | JN412787 | -        |
| <i>Colletotrichum vulgaris</i>                                | YMF 1.04940    | <i>Hippuris vulgaris</i>                              | China       | OL981265 | OL981291 | OL981239 | -        | -        | -        | -        |
| <i>Colletotrichum wuxiense</i>                                | CGMCC 3.17894  | <i>Camellia sinensis</i>                              | China       | KU252045 | KU251939 | KU251672 | KU252200 | KU251833 | KU252101 | KU251722 |
| <i>Colletotrichum xanthorrhoeae</i>                           | ICMP 17903     | <i>Xanthorrhoea preissii</i>                          | Australia   | JX009927 | JX009823 | JX009478 | JX010448 | JX009653 | JX010138 | KC790689 |
| <i>Colletotrichum</i><br><i>xishuangbannaense</i>             | MFLUCC 19-0107 | <i>Magnolia liliifera</i>                             | China       | MW537586 | MW660832 | MW652294 | -        | -        | -        | -        |
| <i>Colletotrichum yuanjiangense</i>                           | YMF 1.04996    | <i>Ageratina adenophora</i>                           | China       | OK513686 | OK513583 | OK513620 | OK513649 | -        | -        | -        |
| <i>Colletotrichum yulongense</i>                              | CFCC 50819     | <i>Vaccinium dunalianum</i><br>var. <i>urophyllum</i> | China       | MK108992 | MK108991 | MK108989 | MK108993 | MK108990 | MK108995 | -        |

\* Isolates and sequences obtained in this study indicated in **bold**. *gapdh*: glyceraldehyde-3-phosphate dehydrogenase locus; *chs-1*: chitin synthase locus; *act*: actin; *tub2*:  $\beta$ -tubulin locus; *cal*: calmodulin locus; *gs*: glutamine synthetase locus; ApMat: mating type protein 1-2-1 (Mat-1-2-1) gene, and Mat-1-2-1-Apn2 intergenic spacer
